# Supplementary material for: Genetic variation in Sorghum bicolor strigolactones and their role in resistance against Striga hermonthica
Source: PubMed Central journal article supplement — J Exp Bot. 2018 Feb 5;69(9):2415–30. doi: 10.1093/jxb/ery041 (PMC6498397; doi:10.1093/jxb/ery041), 2018-02-05
Supplement: ery041_suppl_supplementary_tables.pdf [file ery041_suppl_supplementary_tables.pdf]

SUPPLEMENTARY MATERIAL

Table S1. Local names, status and collection site of sorghum landraces, improved cultivars, and exotic material used

| No | local name          | Status            | Collection site    |
|----|---------------------|-------------------|--------------------|
| 1  | Aklamoi             | Landrace          | East Sudan         |
| 2  | Arfa Gadamak        | Improved cultivar | East Sudan         |
| 3  | Baham               | Landrace          | Red Sea (Sudan)    |
| 4  | Bari                | Landrace          | South Sudan        |
| 5  | Botana              | Improved cultivar | East Sudan         |
| 6  | Dabar               | Landrace          | Central Sudan      |
| 7  | Dari                | Landrace          | South Sudan        |
| 8  | Debeikri            | Landrace          | North Sudan        |
| 9  | Fakimustahi         | Landrace          | East Sudan         |
| 10 | Feterita Geshaish   | Landrace          | White Nile         |
| 11 | Feterita Geshiash   | Landrace          | White Nile (Sudan) |
| 12 | Framida             | Exotic            | Uganda             |
| 13 | Gadam Elhamam       | Improved cultivar | East Sudan         |
| 14 | Hakika              | Exotic            | Tanzania           |
| 15 | Hariri              | Landrace          | East Sudan         |
| 16 | Hazaztokarwe        | Landrace          | Red sea (Sudan)    |
| 17 | Hemisi              | Landrace          | North Sudan        |
| 18 | IS 15401            | ICRISAT           | ICRISAT            |
| 19 | IS-9830             | Landrace          | Central Sudan      |
| 20 | Kolom               | Landrace          | Blue Nile (Sudan)  |
| 21 | Korokollow          | Landrace          | East Sudan         |
| 22 | Markoob             | Landrace          | West Sudan         |
| 23 | Mogud               | Landrace          | North Sudan        |
| 24 | N13                 | Landrace          | Exotic India       |
| 25 | Najad               | Landrace          | West Sudan         |
| 26 | Naten               | Landrace          | Blue Nile (Sudan)  |
| 27 | SRN39               | Synthetic         | ICRSAT (Sudan)     |
| 28 | Tabat               | Improved cultivar | Central Sudan      |
| 29 | Tafsagabeid         | Landrace          | Blue Nile (Sudan)  |
| 30 | Tetron              | Landrace          | West Sudan         |
| 31 | Tokarawee           | Landrace          | Red Sea (Sudan)    |
| 32 | Wad Ahmed           | Improved cultivar | Central Sudan      |
| 33 | Wad Baco            | Landrace          | East Sudan         |
| 34 | Wad Elmardi         | Landrace          | West Sudan         |
| 35 | Wad Fahel           | Landrace          | White Nile (Sudan) |
| 36 | Zahrat Elgadambalia | Improved cultivar | East Sudan         |

Source: Plant Genetic Resources Unit, Agricultural Research Corporation

Table S2. Genotypic variation in strigolactone production in sorghum. Levels of 5-deoxystrigol, sorgomol and orobanchol in root exudates of sorghum genotypes. C18 and silica purified root exudates were analysed using liquid chromatography coupled with tandem mass spectrometry (LC-MS/MS). Peak area means of 4 replicates. Least significant differences of means at P = 0.05 were determined by ANOVA. Means within a column followed by the same letter(s) are not significantly different according to the Duncans' pairwise comparison (P < 0.05).

| No | Genotype            | 5-deoxystrigol*  | sorgomol*    | orobanchol*  |
|----|---------------------|------------------|--------------|--------------|
| 1  | Aklamoi             | 114 abcdefghi    | 2.65 defghji | 0.28 efghji  |
| 2  | Arfa Gadamak        | 95.9 abcdefgh    | 0.00 m       | 0.08 jk      |
| 3  | Baham               | 118 abcdef       | 0.02 jklm    | 0.02 cdef    |
| 4  | Bari                | 92.2 fhgji       | 3129 a       | 2.57 cde     |
| 5  | Botana              | 32.6 abcdefhgi   | 0.09 klm     | 1.92 cdef    |
| 6  | Dabar               | 21.1 abcdefhgi   | 0.08 hjkl    | 0.11 efghji  |
| 7  | Dari                | 125 abcdegh      | 1362 a       | 2.14 cdef    |
| 8  | Debeikri            | 602 ab           | 0.18 hgjik   | 0.44 cdefgh  |
| 9  | Fakimustahi         | 261 abcdef       | 270 ab       | 0.07 jk      |
| 10 | Feterita            | 427 abcd         | 0.09 defgh   | 0.09 defghi  |
| 11 | Feterita Geshaish   | 262 abcd         | 0.80 efhgjki | 0.57 defghi  |
| 12 | Framida             | 189.15 abcdefhgi | 0.75 jkl     | 7.56 bc      |
| 13 | Gadam Elhamam       | 172 abcdef       | 0.69 defhgi  | 0.38 cdefgh  |
| 14 | Hakika              | 0.21 kl          | 1.32 cdefgh  | 1.36 cdef    |
| 15 | Hariri              | 2.03 kijl        | 9.45 cd      | 0.05 cdefe   |
| 16 | Hazaztokarwe        | 361 abcd         | 0.22 hgjik   | 0.11 efghji  |
| 17 | Hemisi              | 2832 abcdefhg    | 26.6 cdefg   | 4.80 cdef    |
| 18 | IS 15401            | 7.64 fhgji       | 2.10 cdefgh  | 0.26 efghji  |
| 19 | IS-9830             | 0.12 l           | 0.00 m       | 28.7 cd      |
| 20 | Kolom               | 579 a            | 0.13 hgjik   | 0.22 defghi  |
| 21 | Korokollow          | 14.6 cdehfgji    | 0.00 m       | 0.23 defghi  |
| 22 | Markoob             | 179 abcdef       | 0.96 fhgjik  | 0.18 ghijk   |
| 23 | Mogud               | 8.49 efhigj      | 0.01 lm      | 0.14 defghi  |
| 24 | N13                 | 817 a            | 3.45 cdef    | 0.59 cdefghi |
| 25 | Najad               | 524 abcdef       | 6.58 cd      | 1.97 cdef    |
| 26 | Naten               | 10.1 defhgi      | 19.8 bc      | 0.26 defghi  |
| 27 | SRN39               | 3.05 hjki        | 5.71 cde     | 197 ab       |
| 28 | Tabat               | 558 abc          | 2.93 cdefg   | 0.58 cdefg   |
| 29 | Tafsagabeid         | 328 abcde        | 0.13 hgjikl  | 0.04 hjik    |
| 30 | Tetron              | 2.62 jkl         | 0.00 m       | 183 a        |
| 31 | Tokarawe            | 192 fhgji        | 4.48 defhgi  | 0.41 efghji  |
| 32 | Wad Ahmed           | 244 abcdef       | 1.73 m       | 2.56 cdef    |
| 33 | Wad Elmardi         | 187 abcdef       | 1335 a       | 2.28 cdef    |
| 34 | Wad Baco            | 3.18 hgjik       | 1.68 cdefg   | 0.48 cdefg   |
| 35 | Wad Fahel           | 111 abcdefg      | 18.6 bc      | 0.11 efghji  |
| 36 | Zahrat Elgadambalia | 86.2 abcdefgh    | 4.43 cde     | 0.35 cdefgh  |

\*Peak area x10<sup>5</sup>

Table S3. Principle components, Eigenvalues, loadings, and percentage of total variance explained in principal component analysis on the concentration of three strigolactones in the root exudate of 36 sorghum genotypes and their germination stimulant activity (belonging to the data shown in Fig. 7A) or the concentration of three strigolactones in the root exudate of 20 sorghum genotypes and *S. hermonthica* infection in a pot experiment (belonging to the data shown in Fig. 7B).

| For data shown in Fig. 7A |      |                    |        |       |       |                          |        |       |
|---------------------------|------|--------------------|--------|-------|-------|--------------------------|--------|-------|
| PC                        | E*   | Total variance (%) |        |       |       | Eigen vector loading for |        |       |
|                           |      | In                 | Cum    | 5-de  | sorg  | orb                      | Germ   |       |
| 1                         | 1.85 | 47.29              | 47.29  | 0.61  | 0.24  | -0.44                    | 0.60   |       |
| 2                         | 1.09 | 26.84              | 74.13  | 0.15  | 0.82  | 0.52                     | -0.11  |       |
| 3                         | 0.62 | 15.72              | 89.84  | 0.27  | -0.45 | 0.72                     | 0.43   |       |
| 4                         | 0.48 | 10.16              | 100.00 | -0.72 | 0.21  | 0.01                     | 0.65   |       |
| For data shown in Fig. 7B |      |                    |        |       |       |                          |        |       |
| PC                        | E    | Total variance (%) |        |       |       | Eigen vector loading for |        |       |
|                           |      | In                 | Cum    | 5-de  | sorg  | orb                      | Striga | Germ  |
| 1                         | 2.63 | 52.67              | 52.67  | 0.45  | 0.31  | -0.49                    | 0.53   | 0.40  |
| 2                         | 1.02 | 20.49              | 73.16  | 0.25  | 0.79  | 0.18                     | -0.12  | -0.50 |
| 3                         | 0.74 | 14.86              | 88.03  | 0.59  | -0.05 | 0.51                     | -0.36  | 0.49  |
| 4                         | 0.35 | 7.08               | 95.11  | -0.60 | 0.51  | 0.10                     | -0.13  | 0.57  |

\* E, Eigen value; In, Individual; Cum, Cumulative; 5-de, 5-deoxystrigol; sorg, sorgomol; orb, orobanchol; Germ, Germination %; Striga, Striga plants per pot.

Table S4. Emergence rate calculated as days to the first Striga emergence calculated as mean emergence time per 4 replicates. Least significant differences of means at  $P = 0.05$  were determined by ANOVA. Means within a column followed by the same letter(s) are not significantly different according to the Duncan's pairwise comparison ( $P < 0.05$ ).

| No. | genotype            | Days to first Striga emergence |
|-----|---------------------|--------------------------------|
| 1   | Aklamoi             | 15 i                           |
| 2   | Arfa Gadamak        | 24 f                           |
| 3   | Botana              | 27 e                           |
| 4   | Fakimustahi         | 18 h                           |
| 5   | Feterita Geshiash   | 15 i                           |
| 6   | Framida             | 24 f                           |
| 7   | Hariri              | 31 d                           |
| 8   | Gadam Elhamam       | 18 h                           |
| 9   | IS-9830             | 33 c                           |
| 10  | Korokollow          | 23 g                           |
| 11  | Mogud               | 24 f                           |
| 12  | Najad               | 24 f                           |
| 13  | Naten               | 27 e                           |
| 14  | N13                 | 24 f                           |
| 15  | SRN39               | 36 a                           |
| 16  | Tabat               | 15 i                           |
| 17  | Tetron              | 33 c                           |
| 18  | Tokarawe            | 24 f                           |
| 19  | Wad Ahmed           | 35 b                           |
| 20  | Wad Baco            | 27 e                           |
| 21  | Wad Fahel           | 16 i                           |
| 22  | Zahrat Elgadambalia | 18 h                           |

Table S5. Pearson Correlation between emerged number of Striga/pot, total Striga biomass per pot and emergence rate (days to first Striga emergence)

| Striga number                  | Striga biomass (mg) | Days to first Striga emergence | Striga number |
|--------------------------------|---------------------|--------------------------------|---------------|
| Striga numbers                 | 1                   | 0.43*                          | -0.53*        |
| Striga biomass (mg)            |                     | 1                              | -0.56*        |
| Days to first Striga emergence |                     |                                | 1             |

Table S4A. *D27* (DWARF 27) sorghum orthologous putative gene sequence identified by BLASTn using rice *D27* published sequence in the NCBI database (<http://www.ncbi.nlm.nih.gov/;cloneID-FJ641055>).

|                  |                |                                 |
|------------------|----------------|---------------------------------|
| Gene symbol      | <i>SbD27</i>   | Gen. Bank ID                    |
| Gene description | Sb05g022855.1  | 8062677                         |
| Gene type        | protein coding | Ref sequence:<br>X_M002449722.1 |
| Location:        | chromosome: 5  |                                 |

> SbD27: Sb05g022855.1  
ATGGAGGTGCGCCGCACTTGCATGCCCCTTGCTCACGCTCATGGCGTTGGTGTCCCTACCGGCATGGTCG  
TCACCGTCGACAGCAGCAGCAACAGCACGCTCCGTGACGAGGCAGAGCTACACCTACACGAGGAGGA  
AGCGCCTCGCCACCGCGGAGGCGTCATGGCGAGGCCGAGGAGGTGGTGGTGGCGCCGGCGCCACC  
AGCGAGGCCGACACCACCACCAACAACAACAAGGAGAGAACAGCGCTGGCGCCGCGCCACC  
ACCACCACGTACCACGACAGTTGGTTCGACAAGCTGGCCATCGGGTACCTGTCCCAGAACCTTCAAGA  
AGCTTCTGGGATGAAGAACGGAAAGGACGGCTACGAAGGCCTGATAGAGGCGGCACTGGCCATCTCC  
GCGCTGTTCAAGGTTGATCAGCAGTTGGAGACTGTGGCCAAGGCTCTCGAACAGGCCTTCCCAGCTA  
CATCCTCACAATGGCAAGAGATAAACACAAGGTATCTATTATAGACGGTTTAGAAAGTAGGTTGTTCT  
TTGAATATAAGATAAAGATAATGATGCCACCCTCGAGATTTTCTCGAGAGTACTTTGCCGCCTTACCA  
CGATATTCTTCCCTTGGCTCGTTGGACCATGTGAGGTCAGGGAATCCGAAGTTGATGGAAGGAAAGAG  
AAGAATGTGGTCTACATACCCAAATGCAGATTTCTGGAAAGCACCAACTGTGTGCGGAATGTGCACGAA  
CCTTTGCAAATCCCATGCCAGAAGTTCATCCAAGATTCACCTGGCACGGCTGTACTACATGTCTCCAA  
TTTTGAGGACATGAGCTGTGAGATGATCTTTGGACAGCAACCTCCTGAAGATGATCCAGCACTGAAGC  
AGCCCTGCTTCCGGACAAAA

Table S4B. *CCD7* (CAROTENOID CLEAVAGE DIOXYGENASE 7) orthologous putative gene sequence identified by BLASTn in Phytozome (<http://www.phytozome.org>) using published rice *CCD7* sequence in ([www.gramene.org](http://www.gramene.org)) as described by Vallabhaneni et al., 2010; Guan et al., 2012 and Priya and Siva, 2014.

|                                                                                                                                                                                                                                                                                                                                                                                                                                                                                                                                                                                                                                                                                                                                                                                                                                                                                                                                                                                                                                                                                                                                                                                                                                                                                                                                                                                                                                                                                                                                                                                                                                                                                                                                                                                                                                                                                                                                                                                                                              |                                 |                                 |
|------------------------------------------------------------------------------------------------------------------------------------------------------------------------------------------------------------------------------------------------------------------------------------------------------------------------------------------------------------------------------------------------------------------------------------------------------------------------------------------------------------------------------------------------------------------------------------------------------------------------------------------------------------------------------------------------------------------------------------------------------------------------------------------------------------------------------------------------------------------------------------------------------------------------------------------------------------------------------------------------------------------------------------------------------------------------------------------------------------------------------------------------------------------------------------------------------------------------------------------------------------------------------------------------------------------------------------------------------------------------------------------------------------------------------------------------------------------------------------------------------------------------------------------------------------------------------------------------------------------------------------------------------------------------------------------------------------------------------------------------------------------------------------------------------------------------------------------------------------------------------------------------------------------------------------------------------------------------------------------------------------------------------|---------------------------------|---------------------------------|
| Gene symbol                                                                                                                                                                                                                                                                                                                                                                                                                                                                                                                                                                                                                                                                                                                                                                                                                                                                                                                                                                                                                                                                                                                                                                                                                                                                                                                                                                                                                                                                                                                                                                                                                                                                                                                                                                                                                                                                                                                                                                                                                  | <i>CCD7</i>                     | Gen. Bank ID                    |
| Gene description                                                                                                                                                                                                                                                                                                                                                                                                                                                                                                                                                                                                                                                                                                                                                                                                                                                                                                                                                                                                                                                                                                                                                                                                                                                                                                                                                                                                                                                                                                                                                                                                                                                                                                                                                                                                                                                                                                                                                                                                             | Carotenoid cleavage dioxygenase | 8055963                         |
| Gene type                                                                                                                                                                                                                                                                                                                                                                                                                                                                                                                                                                                                                                                                                                                                                                                                                                                                                                                                                                                                                                                                                                                                                                                                                                                                                                                                                                                                                                                                                                                                                                                                                                                                                                                                                                                                                                                                                                                                                                                                                    | Sb06g024560<br>protein coding   | Ref sequence:<br>X_M002446857.1 |
| Location:                                                                                                                                                                                                                                                                                                                                                                                                                                                                                                                                                                                                                                                                                                                                                                                                                                                                                                                                                                                                                                                                                                                                                                                                                                                                                                                                                                                                                                                                                                                                                                                                                                                                                                                                                                                                                                                                                                                                                                                                                    | chromosome: 6                   |                                 |
| <hr/>                                                                                                                                                                                                                                                                                                                                                                                                                                                                                                                                                                                                                                                                                                                                                                                                                                                                                                                                                                                                                                                                                                                                                                                                                                                                                                                                                                                                                                                                                                                                                                                                                                                                                                                                                                                                                                                                                                                                                                                                                        |                                 |                                 |
| >SbCCD7: Sb06g024560                                                                                                                                                                                                                                                                                                                                                                                                                                                                                                                                                                                                                                                                                                                                                                                                                                                                                                                                                                                                                                                                                                                                                                                                                                                                                                                                                                                                                                                                                                                                                                                                                                                                                                                                                                                                                                                                                                                                                                                                         |                                 |                                 |
| ATGCACGCCGCCGTGCACCACCACCACCCTGGCCACCGCGCACCGCCGCCTCGCCGCTGCTCTCGCGG<br>CCACGGGCGCAGCAGCGTCCGCTCCGCGCCGCGGCCACCACCGTACCAGCACCCGGGCGCC<br>GCGGCGACAGCGCCGACTCGCCGTCCGCGTCGTTCTGGGACTACAACCTCCTGTTCCGGTTCGAGCG<br>CGCCGAGTGCCGCGACCCCGTCCGCGTCCGCGTACCAGAGGGCGCGATCCCGGCGGACTTCCCGTCCG<br>GCACCTACTACCTCGCCGGTCCGGGGATGTTACCGACGACCACGGGTCCACCGTGCACCCGCTCGAC<br>GGCCACGGCTACCTCCGCTCGTTCGGCTCCGACGGCGCGCCGGCGCGCTACTCCGCGCGGTA<br>CGTGGAGACGGCGGCGAAGCGGGAGGAGCACGACGCGCCGCGCTCGTTCGTGGCGGTTACGCACCGG<br>GGCCCCTTCTCGGTGCTGCAGGGCGGGACCCGGGTGGGCAACGTGAAGGTGATGAAGAACGTGGCCA<br>ACACCAGCGTGCTGCGCTGGGGCGGCCGCGTGCTCTGCCTCTGGGAAGGCGGCGAGCCGTACGAGCTG<br>GACCCGCGGACGCTGGAGACCATCGGCCCGTTCGACATCCTCGGCCGCCTCGCCACCGGCGGCGAAGC<br>GGCAGGAGACGACGACAGCAGCGAGGCTGCGCGTCTCGGGCGCCGGCGGCCGTGGCTGCAGGAGGCA<br>GGGATCGACGTGGCCGCGCGCCTGCTGCGACCGGTCTCGGTGGTGTCTTACGATGCCGGCCAAGCG<br>GCTGCTCGCGCACTACAAGATCGACCAGGAGAGGAACCGGCTGCTCATGGTGGCCTGCAACGCCGAG<br>GACATGCTCCTCCCGCGCTCCAATTCTACTTTCTACGAGTTCGACGCCGACTTCGCGCTGGTGCAGACG<br>CGGGAGTTTGTCTTGCCGGACCACCTGATGATCCACGACTGGACCTTACGGACAGCCACTACGTCTCT<br>CCTCGGCAACAGAATCAGGCTGGACATTCCAGGTTGCTGCTGGCGCTCACGGGCACTACCCAATGA<br>TCGCGGCCCTCGCCGTGGACCCGAGCCGGCAGTCCACGCCCGTCTACCTGCTGCCGCGTCCCCGGAG<br>GCCGAGCCCCCGGCCGACTGGAGCGTGCCCATCGAGGCGCCATCGCAGATGTGGTCCATGCACGT<br>CGGCAACGCCTTCGAGGAGCGCAACGCCCGGGGCGGCATCAACATTAGCTCCACATGTCCGGCTGCT<br>CTTACCAGTGGTTCAACTTCCACAGGATGTTTGGTTACAATTGGCAGAACAAGAAGCTGGACCCGTCC<br>TTCATGAACATAGCCAAGGGCAGGGAATGGCTACCTCGTCTTGTACAGGTGTCCATCGACCTCGACAA<br>GAGAGGAACGTGCCGAGGATGCTCCGTCCGGAGATTGTCCGACCAGTGGACCAGGCCGGCGGACTTC<br>CCGGCGATCAACCCAGGCTTCGCCAACCGGAGGAACCGGTTTCATCTACGCCGGCGGCGCCTCCGGTTC<br>ACGACGATTCTTGCCGTAATCCCTTCGACAGCGTCGTCGAGGTAGACGTCGCTGATGGATCAGCGC<br>GGTCGTGGTTCAGTCCCGGGCGCAAGTTCGTTGGTGGAGCCGGTCTTTCGTCGCCGACCGGCAGTAGCGAG<br>GATGACGGCTATGTTCTGCTTGTGAGTATGCAGTGTCTGATCACAGGTGCCATCTGGTGGTGTGGAC<br>GCAAGGAAGATCGGGGAAAGGGACGCAGTTGTGGCAAACTTGAGGTGCCAAGCACCTCACCTTCC<br>CAATGGGATTCATGGGTTCTGGGCAGATGAATGA |                                 |                                 |
| <hr/>                                                                                                                                                                                                                                                                                                                                                                                                                                                                                                                                                                                                                                                                                                                                                                                                                                                                                                                                                                                                                                                                                                                                                                                                                                                                                                                                                                                                                                                                                                                                                                                                                                                                                                                                                                                                                                                                                                                                                                                                                        |                                 |                                 |

Table S4C. *CCD8* (CAROTENOID CLEAVAGE DIOXYGENASE 8) orthologous putative gene sequence identified by BLASTn in Phytozome (<http://www.phytozome.org>) using published rice *CCD8* sequence obtained from ([www.gramene.org](http://www.gramene.org)) as described by Vallabhaneni et al., 2010; Guan et al., 2012 and Priya and Siva, 2014.

|                                                                                                                                                                                                                                                                                                                                                                                                                                                                                                                                                                                                                                                                                                                                                                                                                                                                                                                                                                                                                                                                                                                                                                                                                                                                                                                                                                                                                                                                                                                                                                                                                                                                                                                                                                                                                                                                                                                                                                                                                            |                                                  |                               |
|----------------------------------------------------------------------------------------------------------------------------------------------------------------------------------------------------------------------------------------------------------------------------------------------------------------------------------------------------------------------------------------------------------------------------------------------------------------------------------------------------------------------------------------------------------------------------------------------------------------------------------------------------------------------------------------------------------------------------------------------------------------------------------------------------------------------------------------------------------------------------------------------------------------------------------------------------------------------------------------------------------------------------------------------------------------------------------------------------------------------------------------------------------------------------------------------------------------------------------------------------------------------------------------------------------------------------------------------------------------------------------------------------------------------------------------------------------------------------------------------------------------------------------------------------------------------------------------------------------------------------------------------------------------------------------------------------------------------------------------------------------------------------------------------------------------------------------------------------------------------------------------------------------------------------------------------------------------------------------------------------------------------------|--------------------------------------------------|-------------------------------|
| Gene symbol                                                                                                                                                                                                                                                                                                                                                                                                                                                                                                                                                                                                                                                                                                                                                                                                                                                                                                                                                                                                                                                                                                                                                                                                                                                                                                                                                                                                                                                                                                                                                                                                                                                                                                                                                                                                                                                                                                                                                                                                                | <i>CCD8</i>                                      | Gen. Bank ID                  |
| Gene description                                                                                                                                                                                                                                                                                                                                                                                                                                                                                                                                                                                                                                                                                                                                                                                                                                                                                                                                                                                                                                                                                                                                                                                                                                                                                                                                                                                                                                                                                                                                                                                                                                                                                                                                                                                                                                                                                                                                                                                                           | Carotenoid cleavage dioxygenase<br>Sb03g034400.1 | 8062181                       |
| Gene type                                                                                                                                                                                                                                                                                                                                                                                                                                                                                                                                                                                                                                                                                                                                                                                                                                                                                                                                                                                                                                                                                                                                                                                                                                                                                                                                                                                                                                                                                                                                                                                                                                                                                                                                                                                                                                                                                                                                                                                                                  | protein coding                                   | Ref sequence:<br>X_M002458432 |
| Location:                                                                                                                                                                                                                                                                                                                                                                                                                                                                                                                                                                                                                                                                                                                                                                                                                                                                                                                                                                                                                                                                                                                                                                                                                                                                                                                                                                                                                                                                                                                                                                                                                                                                                                                                                                                                                                                                                                                                                                                                                  | chromosome: 3                                    |                               |
| <hr/>                                                                                                                                                                                                                                                                                                                                                                                                                                                                                                                                                                                                                                                                                                                                                                                                                                                                                                                                                                                                                                                                                                                                                                                                                                                                                                                                                                                                                                                                                                                                                                                                                                                                                                                                                                                                                                                                                                                                                                                                                      |                                                  |                               |
| >SbCCD8: Sb03g034400.1                                                                                                                                                                                                                                                                                                                                                                                                                                                                                                                                                                                                                                                                                                                                                                                                                                                                                                                                                                                                                                                                                                                                                                                                                                                                                                                                                                                                                                                                                                                                                                                                                                                                                                                                                                                                                                                                                                                                                                                                     |                                                  |                               |
| ACCAGTACACACCACACTCTCGGCTAGCTAGCTAGCGAGCTACTACTGACCTCTCCTTTTCTTAT<br>TAGCTCCAAATTAAGAGCCCGCCCTGGTACTACAACCCTAGCAAGAGCATTTTGCCATGTCTCCCAC<br>TATGGCTTCGTCGCTCTGCGTGTTCAGCGATGTCTGGCGCCACCGGCAGGCCGTCGTCGACCGGTG<br>CTCGGTGGTGCCGCCGGGCGCTGTCCAGTACTGCACAGGGGACCAAGGGAAAGAGGGGCCGTGGTG<br>CAGCCTCTCGCGGCTAGCGTCGTGACGGACACGCCGACGCCGACGCCGGCCATAGCTCCGGCGCCCC<br>GCCAGCTCGGCCAGTCGTCGACGCCCGCGCCCGCTGGGGGCCGCGGCACCGGCGAGCACGCGGCG<br>TGGAAGAGCGTCCGGCAGGAGAGGTGGGAGGGGGCGCTGGAGCTGGAGGGAGAGCTGCCGCTCTGGC<br>TGGATGGCACGTACCTGAGGAACGGCCCCGGCCTGTGGAACCTGGGCGACTACGGCTTCCGGCACCTG<br>TTCGACGGCTACGCGACGCTGGTCCGCGTCTCGTTCCGCAACGGGCACGCGGTGGGCGCGCACCGGCA<br>GATCGAGTCGGAGGCGTACAAGGCGGCGCGCGGAACGGCAAGGTGTGCTACCGCGAGTTCTCGGAG<br>GTGCCAAGGCGGACAGCTTCTCTCCACGTGGGCCAGCTCGCCACCCTCTTCTCGGGCTCCTCGCTC<br>ACCGACAACCTCAACACGGGCGTGGTCAGGCTCGGCGACGGCCGCGTGTGTGCCTGACGGAGACCA<br>TCAAGGGCTCCATCGTGGTCGACCCGGACACGCTGGACACCCTCGGCAAGTTCGAGTACACGGACAAG<br>CTGGGCGGCCTCATCCACTCGGCGCACCCCATCGTGACGGACACCGAGTTCTGGACGCTGATCCCGGA<br>CCTCATCCGCCCCGGGCTACTCGGTGGTGCAGATGGACGCCGGGACCAACGAGCGGCGGTTTCGTGGCA<br>GGGTGGACTGCCGCGGCGGGCCGGCGCCCGGTGGGTGCACTCGTTCCCCATCACGGACACTACGTG<br>GTCGTGCCGGAGATGCCGCTCCGGTACTGCGCCAGGAACCTCCTCCGCGCGGAGCCACCCCGCTGTA<br>CAAGTTCGAGTGGCACCTCGAGTCCGGCAGCTACATGCACGTATGTGCAAGGCCAGCGGCAGGGTCG<br>TGGCAGCGTGGAGGTGCCGCCCTTCGTACCTTCCACTTCATCAACGCGTACGAGGAGAAGGACGAG<br>GAGGGCCGCGTCACGGCGATCGTCGCCGACTGCTGCGAGCACAACGCCAACACCACCTCCTCGACA<br>AGCTCCGGTCCAGAACCTCCGCTCTTCCACCGGGCAGGACGTCCTCCCGGACGCCAGGGTGGGCCGG<br>TTCAGGATCCCGCTGGACGGGAGCCCGTTTCGGCGAGCTGGAGTCGGCGCTGGACCCGGACCAGCACG<br>GCCGCGGGATGGACATGTGCAGCATCAACCCGGCCACGTCGGCAAGAAGTACCGGTACGCCTACGC<br>CTGCGGCGCCAGCGGCCGTGCAACTTCCCAAACACCCTACCAAGATCGACCTGGTGGAGAAGACG<br>GCCAAGAAGTGGTACGAGGAGGGCGCCGTGCCGTCAGAGCCCTTCTTCGTGCCGCGCCGGGCGCCGT<br>GGAGGAGGACGACGGCGTTGCGATTTTCGATGGTGAAGCGCAAGGACGGATCGGCGTACGCGCTAGTG<br>CTGGACGCCAAGACGTTCCAGGAGATCGCGCGGGCCAAGTTCCTGACGCGATGCCCTACGGTTTGA<br>CTGCTGCTGGGTGCCTAGGACCACCTCAGACGCGTAG |                                                  |                               |

**Table S4D.** *SbMAX*, orthologous putative gene sequence identified by BLASTn in PlantGDB (<http://www.plantgdb.org/>) using *Arabidopsis thaliana* *MAX1* (AT2G26170) published sequence obtained from ([www.arabidopsis.org](http://www.arabidopsis.org)).

|                  |                                               |                                 |
|------------------|-----------------------------------------------|---------------------------------|
| Gene symbol      | SbOrtholog ( <i>MAX1</i> )<br>Sb03g032220     | Gen. Bank ID                    |
| Gene description | SbOrtholog ( <i>MAX1</i> )<br>cytochrome P450 | 8068068                         |
| Gene type        | protein coding                                | Ref sequence:<br>XM_002456168.1 |
| Location:        | chromosome: 3                                 |                                 |

---

>SbMAX1: Sb03g032220  
ATGGAGATGGGCACGGTTCTGGGTGCCATGGAGGAGTACACCTTCACCTTCCTGGCCATGGCCGTGGG  
GTTCCCTAGTGCTTGTGTATCTGTACGAGCCGTAAGGAGTGCAGCCACGTGCCCCGGGCCCGTGCCGCT  
GCCGCTCATCGGCCACCTCCACCTGCTGGCGAAGCACGGCCCAGACGTCTTCCCTGTGCTCGCCAAGA  
AGCACGGGCCTATCTTCAGATTTACGTGGGAAGGCAGCCATTGATCATCGTGGCCGACGCAGAGCTC  
TGCAAGGAGGTGGGCATCAAGAAGTTCAAGAGCATGCCTAACCGGAGCTTGCCTTCGCCATCGCCAA  
TTCTCCATACATCGGAAAGGCCTCTTCGCTACAAGGGATTGAGGTGGTGGCGATGCGAAACGTTA  
TCGTCTCGATCTACCAGCCGTCGCACCTCGCCGGCTGATGCCGACCATGGAGTCGTGCATCGAGCGC  
GCTGCGACGACGAACCTCGGCGATGGCGAGGAGGTCGTCTTCTCCAAGCTGGCGCTGAGCCTCGCCAC  
CGACATCATCGGGCAAGCGGCTTCGGCACAGACTTTGGCCTCTCGGGAAAGCCGGTGGTGCCTGACG  
ATGACATGAAGGGTGTGCGACGTCGTCGTGGAGATGCAGCGAAGGCGAAGGCGTCATCATCGGAATT  
CATAAACATGCACATCCACTCGACCACGTCGCTCAAGATGGACCTGTCGGGGTCGCTCTCCACCATCG  
TTGGCGCGCTCGTGCCCTTCTGCAGAATCCGCTGCGGCAGGTGCTCTTGAGGGTCCCCGGCTCCGCCG  
ACCGGGAGATCAACCGTGTGAACGGCGAGCTCCGTAGGATGGTGGACGGCATCGTCGCCGCCCGCGC  
AGCGGAGAGGGAGCGTGCGCCGGCGGCGACAGCAGCACAGCAGCACAAGGACTTCTCTCCGTGGTG  
CTGGCGGGGAGGGAGAGCGACGCTCCACGCGGGAGCTGCTCTCGCCGACTACTTGAGCGCGTTGA  
CCTACGAGCACCTCATCGCTGGGCCGCGACCGCGGGCTTACGCTGTCCTCCGTGGTCTACCTCGTCCG  
CCAAGCACCCGGAAGTGGAGGAGAAGCTGCTTAGGGAGATGGACGCGTTTCGGCCCTCGCGGCAGTGT  
GCCACGGCGGATGATCTTCAGACCAAGTTCCCTACCTCGATCAGGTGGTGAAGGAGTCGATGAGGC  
TGTTTCATGGTGTGCCATTGGTGGCGCGAGAGACCTCCGAGCGAGTGGAGATCGGTGGCTATGTGCTT  
CCAAAGGGGCGCATGGGTGTGGATGGCACCAGGGGTCCTCGCCAAGGACGCCCACTTCCCGGACC  
CGGAGCTGTTCCGACCAGAGCGGTTTCGACCCAGCCGGCGACGAGCAAAAAGAAGCGTCACCCATACGC  
GTTTCATCCCTTTTGAATCGGCCCCAGGGTTTGCATCGGCCAGAAGTTCGCCATCCAGGAGATCAAGC  
TCGCGATAATCCACCTCTATCAGCACTATGTGTTCCGGCATTCTCCAGCATGGAGTCCCCTCTAGAGT  
TTCAGTTTGGGATTGTGGTCAACTTCAAGCATGGTGTCAAGCTTCACGTATCAAGAGGCATGTGGAA  
AATAATTAA

---



Table S5A. Primers used for quantitative RT-PCR

| Predicted locus/ Gene symbol | Primer pair             |
|------------------------------|-------------------------|
| SbD27                        | F_TG TTCAGGGTTGATCAGCAG |
| Sb05g022855.1                | R_CGAGGGTGGCATCATTATCT  |
| SbCCD8                       | F_GAGTACTTTGCCGCCTTCAC  |
| Sb03g034400.1                | R_ACTTCTGGCATGGGATTTTG  |
| SbCCD7                       | F_ACGCAGATTCTTGCCGTACT  |
| Sb06g024560                  | R_CAAGCAGAACATAGCCGTCA  |
| SbMAX1                       | F_GTGGAGATCGGTGGCTATGT  |
| Sb03g032220                  | R_AAAAGGGATGAACGCGTATG  |
| SbActin1                     | F_ACATTGCCCTGGACTACGAC  |
| Actin                        | R_TGATGACCTGTCCATCAGGA  |

Table S5B. Primers used for quantitative PCR for Marker analysis:

| Sequence Name | Sequence                        |
|---------------|---------------------------------|
| SB3344-F      | GCC TCT GCC TCT TGG AAT CAG TTA |
| SB3344-R      | AAG AAA GGG AGT AAC CGG ATG AGC |

Table S6. Correlation coefficients between strigolactone peak area in the root exudates, and expression of biosynthetic genes D27 and CCD8 Striga germination and Striga emergence in a pot experiment employing 20 sorghum genotypes.

|             | 5-deoxystrigol | sorgomol | orobanchol |
|-------------|----------------|----------|------------|
| <i>D27</i>  | 0.70**         | 0.73**   | -0.38NS    |
| <i>CCD8</i> | -0.80**        | -0.71    | 0.21NS     |

\*\*indicates significance at P<0.05
